# Supplementary material for: The Incidence and Course of Depression in Bereaved Youth 21 Months After the Loss of a Parent to Suicide, Accident, or Sudden Natural Death
Source: Atypon-hosted journal article supplement (doi:10.1176/appi.ajp.2009.08081244), 2009-05-01
Supplement: ajp_08081244_correction01.pdf [file ajp_08081244_correction01.pdf]

**To:** Michael D. Roy  
Executive Editor, The American Journal of Psychiatry

**From:** David A. Brent, MD  
Academic Chief, Child and Adolescent Psychiatry  
Western Psychiatric Hospital  
Endowed Chair in Suicide Studies  
Professor of Psychiatry, Pediatrics, and Epidemiology  
University of Pittsburgh School of Medicine

**Date:** 6/19/2019

**Re:** Brent, David, et al. "The incidence and course of depression in bereaved youth 21 months after the loss of a parent to suicide, accident, or sudden natural death." American Journal of Psychiatry 166.7 (2009): 786-794.

---

The Suicidal Ideation Questionnaire- Jr. (Reynolds WM, Mazza JJ, 1999) consists of 15 items each scored on a seven-point scale from 0 ("I never had this thought") to 6 (Almost every day"). A total score ranging from 0 to 90 is calculated as the sum of each item. "Clinically significant" suicidal ideation is defined as a total score greater or equal to 31.

In our database, we incorrectly coded each item on a 1 to 7 scale, which inflated the total score by 15 points. Therefore, the means and the cut-point for "clinically significant" suicidal ideation we reported are incorrect. Corrections are below:

- 1) Table 2. Current Diagnoses and Symptoms in 7–25-Year-Old Offspring 21 Months After the Death of a Parent and in Nonbereaved Comparison Offspring

*Reported*

|                                                                                                   | Parental Death<br>Due to Suicide<br>(53 offspring) |    | Parental Death<br>Due to<br>Accident<br>(44 offspring) |    | Parental Death<br>Due to Sudden<br>Natural Cause<br>(79 offspring) |    | Comparison<br>Offspring<br>(168 offspring) |    | Analysis |       |      |
|---------------------------------------------------------------------------------------------------|----------------------------------------------------|----|--------------------------------------------------------|----|--------------------------------------------------------------------|----|--------------------------------------------|----|----------|-------|------|
|                                                                                                   | Mean                                               | SD | Mean                                                   | SD | Mean                                                               | SD | Mean                                       | SD | F        | df    | p    |
| Suicidal Ideation<br>Questionnaire-JR<br>(child) or Suicidal<br>Ideation Questionnaire<br>(adult) | 21                                                 | 9  | 19                                                     | 5  | 23                                                                 | 15 | 20                                         | 12 | 1.2      | 3,310 | 0.29 |

*Corrected*

|                                                                                       | Parental Death Due to Suicide (53 offspring) |    | Parental Death Due to Accident (44 offspring) |    | Parental Death Due to Sudden Natural Cause (79 offspring) |    | Comparison Offspring (168 offspring) |    | Analysis |       |      |
|---------------------------------------------------------------------------------------|----------------------------------------------|----|-----------------------------------------------|----|-----------------------------------------------------------|----|--------------------------------------|----|----------|-------|------|
|                                                                                       | Mean                                         | SD | Mean                                          | SD | Mean                                                      | SD | Mean                                 | SD | F        | df    | p    |
| Suicidal Ideation Questionnaire-JR (child) or Suicidal Ideation Questionnaire (adult) | 6                                            | 9  | 4                                             | 5  | 8                                                         | 15 | 5                                    | 12 | 1.2      | 3,310 | 0.29 |

- 2) Table 3. Correlates of Depression Occurring in 7–25-Year-Old Offspring Between 9 and 21 Months After the Death of a Parent and in Nonbereaved Comparison Offspring

*Reported*

|                   | No Depression (N=307) |     | Depression (N=35) |      | Analysis |      |       |
|-------------------|-----------------------|-----|-------------------|------|----------|------|-------|
|                   | Mean                  | SD  | Mean              | SD   | t        | df   | p     |
| Suicidal Ideation | 20.1                  | 9.2 | 29.3              | 16.2 | -3.2     | 34.4 | 0.003 |

*Corrected*

|                   | No Depression (N=307) |     | Depression (N=35) |      | Analysis |      |       |
|-------------------|-----------------------|-----|-------------------|------|----------|------|-------|
|                   | Mean                  | SD  | Mean              | SD   | t        | df   | p     |
| Suicidal Ideation | 5.1                   | 9.2 | 14.3              | 16.2 | -3.2     | 34.4 | 0.003 |
